# Knowledge, Health Seeking Behavior and Perceived Stigma towards Tuberculosis among Tuberculosis Suspects in a Rural Community in Southwest Ethiopia

Gemeda Abebe<sup>1,9\*</sup>, Amare Deribew<sup>2,9</sup>, Ludwig Apers<sup>3</sup>, Kifle Woldemichael<sup>2</sup>, Jaffer Shiffa<sup>4</sup>, Markos Tesfaye<sup>5</sup>, Alemseged Abdissa<sup>1</sup>, Fetene Deribie<sup>1</sup>, Chali Jira<sup>6</sup>, Mesele Bezabih<sup>1</sup>, Abraham Aseffa<sup>7</sup>, Luc Duchateau<sup>8</sup>, Robert Colebunders<sup>3,9</sup>

**1** Department of Medical Laboratory Sciences and Pathology, Jimma University, Jimma, Ethiopia, **2** Department of Epidemiology, Jimma University, Jimma, Ethiopia, **3** Department of Clinical Sciences, Institute of Tropical Medicine, Antwerp, Belgium, **4** Department of Internal Medicine, Jimma University, Jimma, Ethiopia, **5** Department of Psychiatry, Jimma University, Jimma, Ethiopia, **6** Department of Health Service Management, Jimma University, Jimma, Ethiopia, **7** Armauer Hanssen Research Institute, Addis Ababa, Ethiopia, **8** Department of Comparative Physiology and Biometrics, University of Ghent, Ghent, Belgium, **9** Department of Epidemiology and Social Medicine, University of Antwerp, Antwerp, Belgium

## Abstract

**Background:** Perceived stigma and lack of awareness could contribute to the late presentation and low detection rate of tuberculosis (TB). We conducted a study in rural southwest Ethiopia among TB suspects to assess knowledge about and stigma towards TB and their health seeking behavior.

**Methods:** A community based cross sectional survey was conducted from February to March 2009 in the Gilgel Gibe field research area. Any person 15 years and above with cough for at least 2 weeks was considered a TB suspect and included in the study. Data were collected by trained personnel using a pretested structured questionnaire. Logistic regression analysis was done using SPSS 15.0 statistical software.

**Results:** Of the 476 pulmonary TB suspects, 395 (83.0%) had ever heard of TB; “evil eye” (50.4%) was the commonly mentioned cause of TB. Individuals who could read and write were more likely to be aware about TB [(crude OR = 2.98, (95%CI: 1.25, 7.08)] and more likely to know that TB is caused by a microorganism [(adjusted OR = 3.16, (95%CI: 1.77, 5.65)] than non-educated individuals. Males were more likely to know the cause of TB [(adjusted OR = 1.92, (95%CI: 1.22, 3.03)] than females. 51.3% of TB suspects perceived that other people would consider them inferior if they had TB. High stigma towards TB was reported by 199 (51.2%). 220 (46.2%) did not seek help for their illness. Individuals who had previous anti-TB treatment were more likely to have appropriate health seeking behavior [(adjusted OR = 3.65, (95%CI: 1.89, 7.06)] than those who had not.

**Conclusion:** There was little knowledge about TB in the Gilgel Gibe field research area. We observed inappropriate health seeking behavior and stigma towards TB. TB control programs in Ethiopia should educate rural communities, particularly females and non-educated individuals, about the cause and the importance of early diagnosis and treatment of TB.

**Citation:** Abebe G, Deribew A, Apers L, Woldemichael K, Shiffa J, et al. (2010) Knowledge, Health Seeking Behavior and Perceived Stigma towards Tuberculosis among Tuberculosis Suspects in a Rural Community in Southwest Ethiopia. PLoS ONE 5(10): e13339. doi:10.1371/journal.pone.0013339

**Editor:** Igor Mokrousov, St. Petersburg Pasteur Institute, Russian Federation

**Received:** April 9, 2010; **Accepted:** September 16, 2010; **Published:** October 11, 2010

**Copyright:** © 2010 Abebe et al. This is an open-access article distributed under the terms of the Creative Commons Attribution License, which permits unrestricted use, distribution, and reproduction in any medium, provided the original author and source are credited.

**Funding:** The study was funded by the Directorate General for Development Cooperation (DGDC) through the Flemish Interuniversity Council (VLIR-UOS). The funders had no role in study design, data collection and analysis, decision to publish, or preparation of the manuscript.

**Competing Interests:** The authors have declared that no competing interests exist.

\* E-mail: gemeda.abebe@ju.edu.et

## Introduction

TB is a major cause of illness and death worldwide. The burden is rising globally as a result of poverty, population growth and HIV/AIDS [1,2]. The World Health Organization (WHO) reported 9.27 million cases of TB in 2007. Among the 15 countries with the highest estimated TB incidence rates, 13 are in Africa which accounts for 31% of the global total [3].

In Ethiopia, TB is the major cause of death and hospital admission [4]. The country stands 7<sup>th</sup> among the 22 highest burden countries [3]. The Directly Observed Treatment Short course (DOTS), the internationally recommended strategy for TB

control, was adopted in 1992. DOTS comprises five components of which case detection by sputum smear microscopy and standardized treatment with supervision and patient support are the major ones[5]. Despite the early introduction of DOTS, case detection rate of smear positive pulmonary TB is still very low as compared to the 70% target recommended by WHO [4].

The low case detection rate could be attributed to many factors which could be broadly categorized as patient related delay of health care seeking or failure of the health care system to diagnose patients. Studies have reported that patient delay represented 77% of the total delay period from onset of symptoms to initiation of treatment [6,7].

The DOTS strategy depends on the self presentation of patients to the health centers. Moreover, its success in case finding depends on patient motivation, degree of diagnostic suspicion by health care workers, and the accuracy and effectiveness of diagnostic laboratory services [8]. Delay in diagnosis may lead to progression of disease leading to increased mortality and enhanced TB transmission in the community. Reports have indicated that patients become more contagious as the delay progresses [9]. Treatment delay, which mainly results from delayed diagnosis, is one of the major challenges of TB control programs in developing countries [10,11,12]. It is particularly important in a high HIV prevalence setting like Ethiopia [13,14] where persons with HIV infection are at high risk of developing TB.

Studies in different countries report that knowledge about and stigma towards TB is affected by socio-economic variables [15,16,17]. Low awareness [18,19,20], stigma [21,22], income [23], rural residence [18], illiteracy [18], gender [20,24,25], marital status [19] and distance to the clinic [10,19,25] were reported to affect the health care seeking behavior [26,27].

Most studies about knowledge and stigma towards TB and health seeking behavior were done among patients seeking medical care in health institutions [18,24,26]. The present study was done in rural southwest Ethiopia among TB suspects to describe the knowledge about and stigma towards TB and how that knowledge and stigma affected their health-seeking behavior.

## Methods

### Study Design and Area

A community based cross sectional survey was conducted from February to March 2009 in the Gilgel Gibe field research area, in southwest Ethiopia. The Gilgel Gibe field research area is located in Jimma Zone about 260 km southwest of Addis Ababa around the reservoir of Gilgel Gibe hydroelectric dam. The site is bounded by four districts: Sokoru, Omo-Nada, Tiro-Afata and Qarsa. In the four districts, two small towns and eight rural Kebeles (smallest administrative units), which are found within 10 kilometers of the reservoir of the dam were selected as field research area by Jimma University in 2005. Since 2005, demographic and AIDS mortality surveillance has been undertaken by Jimma University. At the time of the study, the total population of the field research area was 50,156 individuals from 10,859 households.

### Study Population

The study population consisted of all adult TB suspects (described in Table 1) in the Gilgel Gibe Field Research area during the study period. The proportion of TB suspects among the adult population was 2.6% in 2005 [28] and 1.4% in 2002 [29] in two separate studies in southern and central parts of Ethiopia respectively. Using the mean of these two studies (2%), the estimated number of TB suspects among 25,000 adults in the field research area was 500. To find the 500 TB suspects, all households in the research area were visited. Any person with cough for at least 2 weeks was considered as a TB suspect. Individuals less than 15 years of age or temporary residents were excluded from the study. From each TB suspect two sputum samples were collected and analyzed by AFB microscopy. AFB positive study participants were counseled about TB and linked to the nearest health centre to start anti-TB treatment.

### Measurements

TB suspects were identified through a house-to-house survey by asking heads of the households for the presence of individuals with cough for at least two weeks. Data were collected by trained high

**Table 1.** Socio-demographic characteristics of the TB suspects (n = 476) in the Gilgel Gibe field research area, south west Ethiopia, March 2009.

| Characteristic        | Number (%)  |
|-----------------------|-------------|
| <b>Sex</b>            |             |
| Male                  | 189 (39.7)  |
| Female                | 287 (60.3)  |
| <b>Age, mean (SD)</b> |             |
|                       | 40.9 (16.2) |
| <b>Marital status</b> |             |
| Married               | 347 (72.9)  |
| Single                | 50 (10.5)   |
| Divorced              | 26 (5.5)    |
| Widowed               | 53 (11.1)   |
| <b>Ethnicity</b>      |             |
| Oromo                 | 435 (91.4)  |
| Amhara                | 10 (2.1)    |
| Yem                   | 20 (4.2)    |
| Others                | 11 (2.3)    |
| <b>Religion</b>       |             |
| Muslim                | 431 (90.5)  |
| Orthodox              | 40 (8.4)    |
| Protestant            | 5 (1.1)     |
| <b>Education</b>      |             |
| Had formal education  | 82 (17.2)   |
| No formal education   | 394 (82.8)  |
| <b>Occupation</b>     |             |
| Farmer                | 308 (64.7)  |
| Housewives            | 70 (14.7)   |
| Student               | 20 (4.2)    |
| Daily laborer         | 24 (5.0)    |
| Private worker        | 15 (3.2)    |
| Merchant              | 15 (3.2)    |
| Government employee   | 6 (1.2)     |
| Others                | 18 (3.8)    |

doi:10.1371/journal.pone.0013339.t001

school educated personnel using a pretested structured questionnaire in Amharic and Afaan Oromo. The questionnaire contained questions about socio-demographic characteristics, knowledge about TB, health care seeking behavior and stigma towards TB. The TB knowledge questions are summarized in Table 2. We also asked other close ended questions: Have you ever had cough for two or more weeks? If you had cough for two or more weeks, what did you do? Do you know a person with TB? Did you ever take anti-TB treatment? To assess stigma, we used 11 questions adopted from Somma and colleagues [17]. Each question consisted of four responses (strongly disagree, disagree, agree and strongly agree) where 'strongly agree' and 'agree' indicated presence of perceived stigma and 'disagree' and 'strongly disagree' indicated absence of perceived stigma. An answer consistent with stigma towards TB was scored with one point. An answer not consistent with stigma towards TB was scored as zero point. A total stigma score for TB was created by summing the scores of all questions. The stigma score ranged from 1 to 4, with the higher

the score, the greater the degree of stigma towards TB. Individuals who had a stigma score of equal to or greater than the mean score of the study population were categorized as having high stigma towards TB. On the other hand, individuals who scored a stigma score below the mean were categorized as having low stigma towards TB. Since the stigma scores were normally distributed, the mean was used to classify the study population as having high or low stigma.

**Table 2.** Knowledge about TB among TB suspects (n = 395) in the Gilgel Gibe field research area, south west Ethiopia, March 2009.

| Variable                                    | Number (%) |
|---------------------------------------------|------------|
| <b>Perceived causes of TB</b>               |            |
| Evil eye                                    | 199 (50.4) |
| Germs                                       | 133 (33.7) |
| Satan or witchcraft                         | 63 (15.9)  |
| <b>Perceived mode of transmission of TB</b> |            |
| Air borne (cough)                           | 331 (83.8) |
| Unclean food and water                      | 135 (34.2) |
| Being in a crowd                            | 65 (16.5)  |
| Sex with a person with TB                   | 52 (13.2)  |
| Consumption of uncooked milk                | 33 (8.4)   |
| Other                                       | 58 (14.7)  |
| <b>Perceived organ affected by TB</b>       |            |
| Lung                                        | 362 (91.6) |
| Intestine                                   | 35 (8.9)   |
| Bone                                        | 33 (8.4)   |
| Others                                      | 24 (6.1)   |
| <b>Perceived symptoms of TB</b>             |            |
| Cough for 2 weeks or more                   | 294 (74.4) |
| Hemoptysis                                  | 200 (50.6) |
| Fever for 2 weeks or more                   | 152 (38.5) |
| Weight loss and fatigue                     | 146 (37)   |
| Night sweats                                | 125 (31.6) |
| Shortness of breath                         | 104 (26.3) |
| Chest pain                                  | 91 (23.0)  |
| Loss of appetite                            | 44 (11.1)  |
| <b>TB is preventable disease</b>            |            |
| Yes                                         | 235(82.3)  |
| No                                          | 34(8.6)    |
| Do not know                                 | 36(9.1)    |
| <b>TB transmission prevention methods</b>   |            |
| Avoiding cough in front of people           | 275(69.6)  |
| Safe disposal of sputum                     | 248(62.8)  |
| Ventilation of living rooms                 | 108(27.3)  |
| Avoiding sex with TB patients               | 39(9.9)    |
| <b>Heard about TB treatment</b>             |            |
| Yes                                         | 326(82.5)  |
| No                                          | 69(17.5)   |

doi:10.1371/journal.pone.0013339.t002

## Data analysis

Data were double entered using Epi-data version 3.1 (Epi-data, Norway, 2006). For analysis, the data were exported to SPSS version 15.0 statistical software (SPSS Inc. Chicago, 2007). Outcome variables (knowledge about TB, stigma towards TB and health seeking behavior) were dichotomized. Individuals who mentioned microorganism as a cause of TB were categorized as having 'good' knowledge. Those who mentioned other causes such as "evil eye" or Satan or witchcraft were categorized as having 'poor' knowledge. TB suspects who sought help in public or private health facilities were categorized as having 'appropriate' health seeking behavior and those who did nothing or visited other sources such as traditional healers were categorized as having 'inappropriate' health seeking behavior. Socio-demographic characteristics of the study participants were major independent variables. Stigma and knowledge were additional independent variables to represent health seeking behavior. The data analysis was based on logistic regression. First, the different independent variables were fitted univariately to assess their independent effect in terms of the crude odds ratio and its 95% confidence interval (CI). Next, a multivariable logistic regression model was fitted containing all the independent variables that showed a significant effect in the univariate analysis at the 5% significance level, leading to adjusted odds ratio and their 95% confidence intervals.

## Ethics statement

The study was approved by the ethical review committees of Jimma University, the Armauer Hansen Research Institute and Prince Leopold Institute of Tropical Medicine. Written consent was obtained from the study participants.

## Results

### Study participants characteristics

In a house-to-house survey of the 10,859 households in the study area, 476 (1.9% of adult population) TB suspects were identified from 410 households. They were all interviewed. There were 356 households with 1 TB suspect, 52 households with 2 TB suspects and 2 households with 3 TB suspects. One hundred and fifty-six (32.8%) TB suspects had cough for more than 8 weeks, 143 (30.0%) cough since 4–8 weeks and 177 (37.2%) for 2–3 weeks. Women (60.3%), married individuals (72.9%), Muslims (90.5%) and Oromo people (91.4%) constituted the majority of the study population. (Table 1).

### Knowledge

Three hundred ninety-five (83%) TB suspects had ever heard of TB. Only these 395 TB suspects are incorporated in the further analysis. Individuals who could read and write were more likely to have heard of TB [(crude OR = 2.98, (95%CI: 1.25, 7.08)] than those who could not read and write. "Evil eye" (50.4%), germs (33.7%), Satan and witchcraft (15.9%) were thought to be causes of TB. 91.6% of the TB suspects thought that the lungs were the most affected part of the body. Cough for more than 2 weeks (74.4%) and hemoptysis (50.6%) were mentioned as TB symptoms. Airborne transmission through coughing (83.8%), drinking unclean water and eating unclean food (34.2%) were stated as modes of TB transmission. Further, 82.3% responded that it is possible to prevent TB. To avoid coughing in front of people and proper disposal of sputum were cited as preventive strategies by 69.9% and 63.1% of the respondents respectively. 82.5% of the TB suspects have heard about TB treatment. (Table 2).

Individuals who could read and write were more likely to know that a microorganism is the cause of TB [(adjusted OR = 3.16, (95%CI: 1.77, 5.65)] than those who could not read and write. Males were more likely to know the cause of TB [(adjusted OR = 1.92, (95%CI: 1.22, 3.03)] compared to females. (Table 3). Individuals who could read and write were more likely to be aware of anti-TB drugs than individuals who could not read and write. The difference was not statistically significant though [(crude OR = 2.0, (95%CI: 0.92, 4.40)].

### Attitude and stigma

The instrument used in this study to assess TB stigma had a good internal consistency (Cronbach's  $\alpha = 0.87$ ). Of the 395 study participants who ever heard of TB, 5 did not have complete data on TB stigma questions. Only the 390 participants with complete data were included in the analysis. A large proportion of the TB suspects (51.3%) perceived that other people would think less of them if they knew they had TB, 39.5% would be embarrassed if they had TB, 30.3% thought that other people would avoid them if they had TB, 15.1% wanted to keep a possible diagnosis of TB concealed from a confidant. About one fifth thought that TB would have an effect on finding a partner for marriage, the willingness of the partner to have sex, and to be accepted as a member of a social group. (Table 4). Mean stigma score of the study population was 23.82 (minimum 11 and maximum 39). One hundred and ninety (48.8%) had low stigma and 199 (51.2%) reported high stigma towards TB. Stigma was not associated with gender, knowledge about cause and treatment of TB, literacy status, religion, marital status, age, previous anti-TB treatment and previous exposure to a TB patient. (Table 5).

### Health care seeking behavior

Two hundred twenty (46.2%) TB suspects did not seek help, 120 (25.2%) contacted a health institution, 125 (26.3%) went to drug vendors, 29 (6.1%) did self medication and 2 (0.4%) went to traditional healers. The overall median delay to seek help somewhere (except visits to traditional healers) was 4 weeks (range 2–52 weeks). Lack of money mainly for transportation (125 (56.8%)), the perception that the disease will improve (104 (47.3%)), considering the disease to be harmless (19 (8.6%)) and no health facility around (3 (1.4%)) were mentioned as reasons for not seeking help.

Individuals who had previous anti-TB treatment were more likely to take appropriate action for their illness [(adjusted OR = 3.65, (95%CI: 1.89, 7.06))] than individuals who had not experienced anti-TB treatment. Health seeking behavior was not associated with gender, literacy status, marital status, knowledge about cause of TB, awareness about anti-TB treatment, stigma, age, occupation and knowing a TB patient. (Table 6).

### Discussion

In this study, we identified gaps in knowledge about the cause of TB, inappropriate health care seeking behavior and stigma towards TB. About 83% of TB suspects had heard of TB which is similar to a study done in north Ethiopia where 86% of the study participants were aware of TB [30] but lower than the 99.1% reported from India [31].

Traditional beliefs such as “evil eye”, Satan and witchcraft were the commonest perceived causes of TB in our study. In Tanzania, a significant number of people also mentioned that witchcraft could be the cause of TB [32]. Cold air, alcohol, smoking and lack of sanitation were common perceived causes in different studies [30,32]. These traditional beliefs might contribute to the spread of TB as most people with such beliefs may not visit health facilities. A study from Ethiopia showed that 46% of patients seeking care at health facilities did so after informal treatment failed. Moreover, patients' poor perception of the cause of TB such as “evil eye” were related to a prolonged delay to seek medical care [18] although it was not statistically significant in the present study. In our study, only 33.7% of respondents knew that TB is caused by a microorganism which is higher than the finding in Vietnam (22%) [33]. Individuals who could read and write were more likely to know the cause of TB which is consistent with previous reports [30,33]. Males were more likely to know the cause of TB compared with females. The poor knowledge among women and non-educated individuals concerning the cause of TB will result in inappropriate health care seeking behavior [34].

A significant number of study participants had perceived stigma of TB on marital prospects, social and sexual relationships. More than half of the respondents perceived that other people would consider them inferior and a third perceived that others would avoid them as a result of their illness. Such perception might have great impact on the social, psychological and mental well being of the victim and also his/her family. This could have dire

**Table 3.** Factors associated with knowledge about the cause of TB among TB suspects (n = 395) in the Gilgel Gibe field research area, south west Ethiopia, March 2009.

| Variable           | Cause of TB is a microorganism |            | Crude OR<br>(95% CI) | Adjusted OR †<br>(95% CI) |                    |
|--------------------|--------------------------------|------------|----------------------|---------------------------|--------------------|
|                    | Yes (%)                        | No (%)     |                      |                           |                    |
| Marital status     | Single                         | 19 (48.7)  | 20 (51.3)            | 3.80 [1.08, 13.43]        | 2.08 [0.55, 7.95]  |
|                    | Married                        | 100 (34.2) | 192 (65.8)           | 2.09 [0.68, 6.43]         | 2.00 [0.62, 6.51]  |
|                    | Widowed                        | 10 (22.7)  | 34 (77.3)            | 1.18 [0.32, 4.33]         | 1.64 [0.42, 6.38]  |
|                    | Divorced                       | 4 (20)     | 16 (80)              | 1                         | 1                  |
| Sex                | Male                           | 71 (44.4)  | 89 (55.6)            | 2.23 [1.45, 3.41]         | 1.92 [1.22, 3.03]* |
|                    | Female                         | 62 (26.4)  | 173 (73.6)           | 1                         | 1                  |
| Can read and write | Yes                            | 44 (57.9)  | 32 (42.1)            | 3.55 [2.12, 5.96]         | 3.16 [1.77, 5.65]* |
|                    | No                             | 89 (27.9)  | 230 (72.1)           | 1                         | 1                  |

\*Significant ( $p < 0.05$ ),

†Adjusted for marital status, sex and literacy status.

doi:10.1371/journal.pone.0013339.t003

**Table 4.** Attitude of TB suspects (n = 390) towards TB in the Gilgel Gibe field research area, southwest Ethiopia, March 2009.

| Stigma questions                                                                          | Presence or absence of stigma for each stigma item |            |
|-------------------------------------------------------------------------------------------|----------------------------------------------------|------------|
|                                                                                           | Present (%)                                        | Absent (%) |
| If you had TB, others would think less of you                                             | 200 (51.3)                                         | 190 (48.7) |
| If you had TB, you would be ashamed/embarrassed                                           | 154 (39.5)                                         | 236 (60.5) |
| If you had TB, others would avoid you                                                     | 118 (30.3)                                         | 272 (69.7) |
| If you had TB, you would have a problem of finding a partner for marriage even after cure | 80 (20.5)                                          | 310 (79.5) |
| If you had TB, your partner would refuse to have sex with you                             | 87 (22.3)                                          | 303 (77.7) |
| If you had TB, you would be asked to stay away from a social group                        | 94 (24.1)                                          | 296 (75.9) |
| If you had TB, you would not disclose even to a confidant                                 | 59 (15.1)                                          | 331 (84.9) |
| If you had TB, you would think less of yourself                                           | 95 (24.4)                                          | 295 (75.6) |
| If you had TB, you would make others affected by the disease                              | 33 (8.5)                                           | 357 (91.5) |
| If you had TB, others would think less of your family                                     | 165 (42.3)                                         | 225 (57.7) |
| If you had TB, it would be a problem for your children                                    | 273 (70.0)                                         | 117 (30.0) |

doi:10.1371/journal.pone.0013339.t004

consequences in a society where informal social organizations play a pivotal role in the daily lives of individuals. TB patients may deliberately conceal their status to avoid isolation. They may try to live with it for as long as possible, being the source of infection to others. The social isolation of TB patients was also described in

Ghana [35] and Nepal [36]. In Ghana the community felt that TB patients should not sell their items in the market. In Nepal, there was a general believe that you should not meet with people who have TB and not visit a home where there is a household member with TB. In our study stigma was not influenced by gender and

**Table 5.** Factors associated with stigma towards TB among TB suspects (n = 389) in the Gilgel Gibe field research area, south west Ethiopia, March 2009.

|                                   |            | Stigma*    |           | Crude OR (95% CI) |
|-----------------------------------|------------|------------|-----------|-------------------|
|                                   |            | High n(%)  | Low n(%)  |                   |
| <b>Sex</b>                        | Male       | 75(47.2)   | 84(52.8)  | 1.30[0.87, 1.97]  |
|                                   | Female     | 124(53.9)  | 106(46.1) | 1                 |
| <b>Cause of TB</b>                | Germ       | 63( 48.5)  | 67(51.5)  | 0.85[0.56, 1.30]  |
|                                   | Not germ   | 147(56.8)  | 112(42.2) | 1                 |
| <b>Literate</b>                   | Yes        | 36(48.0)   | 39(52.0)  | 0.86[0.52, 1.42]  |
|                                   | No         | 177(56.8)  | 137(43.2) | 1                 |
| <b>TB can be treated</b>          | Yes        | 192(51.1)  | 184(48.9) | 1                 |
|                                   | No         | 7(53.8)    | 6(46.2)   | 1.12[0.37, 3.39]  |
| <b>Religion</b>                   | Muslim     | 1181(51.9) | 168(48.1) | 1                 |
|                                   | Orthodox   | 16(44.4)   | 20(55.6)  | 0.83[0.43, 1.60]  |
|                                   | Protestant | 2(50.0)    | 2(50.0)   | 0.75[0.12, 4.53]  |
| <b>Marital status</b>             | Married    | 152(53.0)  | 135(47.0) | 1                 |
|                                   | Single     | 15(38.5)   | 24(61.5)  | 0.55[0.28, 1.02]  |
|                                   | Divorced   | 7(35.0)    | 13(65.0)  | 0.48[0.19, 1.23]  |
|                                   | Widowed    | 25(58.1)   | 18(41.9)  | 1.23[0.65, 2.36]  |
| <b>Age</b>                        | 15–34      | 59(48.4)   | 63(51.6)  | 1                 |
|                                   | 35–54      | 115(59.6)  | 78(40.4)  | 1.57[0.98, 2.49]  |
|                                   | >54        | 41(55.4)   | 33(44.6)  | 1.33[0.74, 2.37]  |
| <b>Previous anti-TB treatment</b> | Yes        | 24(42.9)   | 32(57.1)  | 1.48[0.83, 2.62]  |
|                                   | No         | 175(52.6)  | 158(47.4) | 1                 |
| <b>Know a person with TB</b>      | Yes        | 90(50.8)   | 87(49.2)  | 0.98[0.66, 1.46]  |
|                                   | No         | 109(51.4)  | 103(48.6) | 1                 |

\*High = total stigma score greater than or equal to the mean score of the study population, low = total stigma score less than the mean score of the study population.  
doi:10.1371/journal.pone.0013339.t005

**Table 6.** Factors associated with health seeking behavior among TB suspects (n = 389) in the Gilgel Gibe field research area, south west Ethiopia, March 2009.

|                                              |                     | Health seeking behavior <sup>#</sup> |                      | Crude OR<br>(95% CI) | Adjusted OR<br>(95% CI)*      |
|----------------------------------------------|---------------------|--------------------------------------|----------------------|----------------------|-------------------------------|
|                                              |                     | Appropriate n(%)                     | Not appropriate n(%) |                      |                               |
| <b>Sex</b> <sup>¶</sup>                      | Male                | 84(52.8)                             | 75(47.2)             | 0.97[0.67, 1.41]     |                               |
|                                              | Female              | 115(50.0)                            | 115(50.0)            | 1                    |                               |
| <b>Can read and write</b> <sup>¶</sup>       | Yes                 | 39(52.0)                             | 36(48.0)             | 1.04[0.63, 1.73]     |                               |
|                                              | No                  | 160(51.0)                            | 154(49.0)            | 1                    |                               |
| <b>Marital status</b> <sup>¶</sup>           | Single              | 23(59.0)                             | 16(41.0)             | 2.88[0.95, 8.72]     |                               |
|                                              | Married             | 147(51.4)                            | 139(48.6)            | 2.12[0.83, 5.40]     |                               |
|                                              | Widowed             | 22(51.2)                             | 21(48.8)             | 2.10[0.71, 6.21]     |                               |
|                                              | Divorced            | 7(33.3)                              | 14(66.7)             | 1                    |                               |
| <b>Cause TB</b> <sup>¶</sup>                 | Germ                | 66(50.8)                             | 64(49.2)             | 0.98[0.64, 1.49]     |                               |
|                                              | Not germ            | 133(51.4)                            | 126(48.6)            | 1                    |                               |
| <b>Heard about TB treatment</b>              | Yes                 | 172(53.6)                            | 149(46.4)            | 1                    | 1                             |
|                                              | No                  | 27(39.7)                             | 41(60.3)             | 1.75[1.03, 3.0]      | 0.65[0.38, 1.13]              |
| <b>Stigma</b> <sup>¶</sup>                   | High                | 108(54.3)                            | 91(45.7)             | 0.78[0.52, 1.15]     |                               |
|                                              | Low                 | 91(47.9)                             | 99(52.1)             | 1                    |                               |
| <b>Age</b> <sup>¶</sup>                      | 15–34               | 57(46.7)                             | 65(53.3)             | 1                    |                               |
|                                              | 35–54               | 109(56.5)                            | 84(43.5)             | 1.48[0.94, 2.33]     |                               |
|                                              | >54                 | 33(44.6)                             | 41(55.4)             | 0.92[0.51, 1.64]     |                               |
| <b>Occupation</b> <sup>¶</sup>               | Farmer              | 138(55.2)                            | 112(44.8)            | 1                    |                               |
|                                              | Housewives          | 23(41.8)                             | 32(58.2)             | 0.58[0.32, 1.05]     |                               |
|                                              | Government employee | 3(50)                                | 3(50)                | 0.81[0.16, 4.10]     |                               |
|                                              | Daily laborer       | 5(23.8)                              | 16(76.2)             | 0.25[0.90, 0.71]     |                               |
|                                              | Student             | 11(68.8)                             | 5(31.2)              | 1.79[0.60, 5.29]     |                               |
|                                              | Merchant            | 9(69.2)                              | 4(30.8)              | 1.83[0.55, 6.09]     |                               |
|                                              | Private work        | 5(35.7)                              | 9(64.3)              | 0.45[0.15, 1.38]     |                               |
|                                              | Others              | 5(35.7)                              | 9(64.3)              | 0.45[0.15, 1.38]     |                               |
| <b>Previous anti-TB treatment</b>            | Yes                 | 43(76.8)                             | 13(23.2)             | 3.87[2.01, 7.44]     | 3.65[1.89, 7.06] <sup>†</sup> |
|                                              | No                  | 156(46.8)                            | 177(53.2)            | 1                    | 1                             |
| <b>Know a person who had TB</b> <sup>¶</sup> | Yes                 | 88(50)                               | 88(50)               | 0.92[0.62, 1.37]     |                               |
|                                              | No                  | 111(52.1)                            | 102(47.9)            | 1                    |                               |

<sup>#</sup>Appropriate = Visits to health institutions, Not appropriate = visits to sources other than health institutions.

<sup>¶</sup>Excluded from final model.

\*Adjusted for information on anti-TB treatment and previous anti-TB treatment.

<sup>†</sup>Statistically significant (p<0.05).

doi:10.1371/journal.pone.0013339.t006

other socio-demographic variables. A multi-country study however showed that women had more impaired self esteem, social isolation and perceived stigma as compared to men [17].

The health care seeking behavior of our study participants was poor. The majority of them did not seek help for their illness as a result of wrong perceptions and lack of financial resources mainly for transport. A significant number of them did nothing since they considered that their illness was not severe. Similar reasons were mentioned in northwest Ethiopia [24], Vietnam [33] and China [37]. In our study, the health care seeking behavior was not affected by gender, the ability to read and write, marital status, knowledge about cause of TB, information about TB treatment, perceived stigma, age, occupation or familiarity with TB patient. But those who ever took anti-TB treatment were more likely to take appropriate action for their illness. Similar finding was

reported from another study in North West part of Ethiopia [24]. In a study from Tanzania, perceived stigma was also not associated with a particular type of health care seeking behavior [38] but in other studies health care seeking behavior was affected by knowledge [19,33], gender [23,33,39,40] and education [25,33].

In this study, we tried to assess several behavioral factors related to knowledge about and stigma towards TB in a rural community which could be potential barriers for national TB control program. However, the study was not without shortfalls. First, we didn't do focus group discussion to triangulate the findings. Second, the stigma questionnaire was not validated.

In conclusion, there was little knowledge about TB in the Gilgel Gibe field research area. We observed inappropriate health care seeking behavior and stigma towards TB. TB control programs in

Ethiopia should educate rural communities, particularly females and non-educated individuals, about the cause and the importance of early diagnosis and treatment of TB.

## Acknowledgments

The authors appreciate the study participants for their cooperation in providing the necessary information.

## References

- Muniyandi M, Ramachandran R, Gopi PG, Chandrasekaran V, Subramani R, et al. (2007) The prevalence of tuberculosis in different economic strata: a community survey from South India. *Int J Tuberc Lung Dis* 11: 1042–1045.
- World Health Organization (2009) “Global Tuberculosis Control: A Short Update To The 2009 Report” (World Health Organization, Geneva, 2009).
- WHO (2009) Global tuberculosis control: epidemiology, strategy, financing: WHO report 2009 (Publication no. WHO/HTM/TB/2009.411). Geneva: World Health Organization.
- Ministry of Health of Ethiopia (MOH): Tuberculosis, Leprosy and TB/HIV Prevention and Control Programme Manual. Addis Ababa: MOH 4th edition. 2008.
- WHO. The stop TB strategy. <http://www.who.int/tb/strategy/en/>. Accessed on July 30, 2010.
- Mesfin Mengiste M, Tasew Tesfay W, Tareke Israel G, Kifle Yohannes T, Karen Witten H, et al. (2005) Delays and care seeking behaviour among tuberculosis patients in Tigray of northern Ethiopia. *Ethiop J Health Dev* 19: 7–12.
- Steen TW, Mazonde GN (1999) Ngaka ya setswana, ngaka ya sekgoa or both? Health seeking behaviour in Botswana with pulmonary tuberculosis. *Soc Sci Med* 48: 163–172.
- Dujardin B, Kegels G, Buve A, Mercenier P (1997) Tuberculosis control: did the programme fail or did we fail the programme? *Trop Med Int Health* 2: 715–718.
- Madebo T, Lindtjorn B (1999) Delay in Treatment of Pulmonary Tuberculosis: An Analysis of Symptom Duration Among Ethiopian Patients. *MedGenMed*: E6.
- Demissie M, Lindtjorn B, Berhane Y (2002) Patient and health service delay in the diagnosis of pulmonary tuberculosis in Ethiopia. *BMC Public Health* 2: 23.
- Wondimu T, W/Michael K, Kassahun W, Getachew S (2007) Delay in initiating tuberculosis treatment and factors associated among pulmonary tuberculosis patients in East Wollega, Western Ethiopia. *Ethiop J Health Dev* 21: 148–156.
- Sreeramareddy CT, Panduru KV, Menten J, Van den Ende J (2009) Time delays in diagnosis of pulmonary tuberculosis: a systematic review of literature. *BMC Infect Dis* 9: 91.
- Kassu A, Mengistu G, Ayele B, Diro E, Mekonnen F, et al. (2007) Coinfection and clinical manifestations of tuberculosis in human immunodeficiency virus-infected and -uninfected adults at a teaching hospital, northwest Ethiopia. *J Microbiol Immunol Infect* 40: 116–122.
- Demissie M, Lindtjorn B, Tegbaru B (2000) Human Immunodeficiency virus (HIV) infection in tuberculosis patients in Addis Ababa. *Ethiop J Health Dev* 14: 277–282.
- Hoa NP, Diwan VK, Co NV, Thorson AE (2004) Knowledge about tuberculosis and its treatment among new pulmonary TB patients in the north and central regions of Vietnam. *Int J Tuberc Lung Dis* 8: 603–608.
- Ouedraogo M, Kouanda S, Boncougou K, Dembele M, Zoubga ZA, et al. (2006) Treatment seeking behaviour of smear-positive tuberculosis patients diagnosed in Burkina Faso. *Int J Tuberc Lung Dis* 10: 184–187.
- Somma D, Thomas BE, Karim F, Kemp J, Arias N, et al. (2008) Gender and socio-cultural determinants of TB-related stigma in Bangladesh, India, Malawi and Colombia. *Int J Tuberc Lung Dis* 12: 856–866.
- Mesfin MM, Newell JN, Walley JD, Gessesew A, Madeley RJ (2009) Delayed consultation among pulmonary tuberculosis patients: a cross sectional study of 10 DOTS districts of Ethiopia. *BMC Public Health* 9: 53.
- Ayuo PO, Diero LO, Owino-Ong’or WD, Mwangi AW (2008) Causes of delay in diagnosis of pulmonary tuberculosis in patients attending a referral hospital in Western Kenya. *East Afr Med J* 85: 263–268.
- Needham DM, Foster SD, Tomlinson G, Godfrey-Faussett P (2001) Socio-economic, gender and health services factors affecting diagnostic delay for tuberculosis patients in urban Zambia. *Trop Med Int Health* 6: 256–259.
- Johansson E, Long NH, Diwan VK, Winkvist A (2000) Gender and tuberculosis control: perspectives on health seeking behaviour among men and women in Vietnam. *Health Policy* 52: 33–51.
- Long NH, Johansson E, Diwan VK, Winkvist A (1999) Different tuberculosis in men and women: beliefs from focus groups in Vietnam. *Soc Sci Med* 49: 815–822.
- Chang CT, Esterman A (2007) Diagnostic delay among pulmonary tuberculosis patients in Sarawak, Malaysia: a cross-sectional study. *Rural Remote Health* 7: 667.
- Yimer S, Holm-Hansen C, Yimaldu T, Bjune G (2009) Health care seeking among pulmonary tuberculosis suspects and patients in rural Ethiopia: a community-based study. *BMC Public Health* 9: 454.
- Huong NT, Vree M, Duong BD, Khanh VT, Loan VT, et al. (2007) Delays in the diagnosis and treatment of tuberculosis patients in Vietnam: a cross-sectional study. *BMC Public Health* 7: 110.
- Shetty N, Shemko M, Abbas A (2004) Knowledge, attitudes and practices regarding tuberculosis among immigrants of Somalian ethnic origin in London: a cross-sectional study. *Commun Dis Public Health* 7: 77–82.
- Getahun H (1999) Medical and social consequences of tuberculosis in rural Ethiopia. *Ethiop Med J* 37: 147–153.
- Shargie EB, Yassin MA, Lindtjorn B (2006) Prevalence of smear-positive pulmonary tuberculosis in a rural district of Ethiopia. *Int J Tuberc Lung Dis* 10: 87–92.
- Demissie M, Zenebere B, Berhane Y, Lindtjorn B (2002) A rapid survey to determine the prevalence of smear-positive tuberculosis in Addis Ababa. *Int J Tuberc Lung Dis* 6: 580–584.
- Mesfin M, Tasew T, Tareke I, Mulugeta G, Richard M (2005) Community knowledge, attitudes and practices on pulmonary tuberculosis and their choice of treatment supervisor in Tigray, Northern Ethiopia. *Ethiop J Health Dev* 19: 21–27.
- Sharma N, Malhotra R, Taneja DK, Saha R, Ingle GK (2007) Awareness and perception about tuberculosis in the general population of Delhi. *Asia Pac J Public Health* 19: 10–15.
- Mangesho PE, Shayo E, Makunde WH, Keto GB, Mandara CI, et al. (2007) Community knowledge, attitudes and practices towards tuberculosis and its treatment in Mpwapwa district, central Tanzania. *Tanzan Health Res Bull* 9: 38–43.
- Hoa NP, Thorson AE, Long NH, Diwan VK (2003) Knowledge of tuberculosis and associated health-seeking behaviour among rural Vietnamese adults with a cough for at least three weeks. *Scand J Public Health Suppl* 62: 59–65.
- Wang J, Fei Y, Shen H, Xu B (2008) Gender difference in knowledge of tuberculosis and associated health-care seeking behaviors: a cross-sectional study in a rural area of China. *BMC Public Health* 8: 354.
- Dodor EA, Kelly S (2009) ‘We are afraid of them’: attitudes and behaviours of community members towards tuberculosis in Ghana and implications for TB control efforts. *Psychol Health Med* 14: 170–179.
- Baral SC, Karki DK, Newell JN (2007) Causes of stigma and discrimination associated with tuberculosis in Nepal: a qualitative study. *BMC Public Health* 7: 211.
- Wang Y, Long Q, Liu Q, Tolhurst R, Tang S (2008) Treatment seeking for symptoms suggestive of TB: comparison between migrants and permanent urban residents in Chongqing, China. *Trop Med Int Health* 13: 927–933.
- Kiwuwa MS, Charles K, Harriet MK (2005) Patient and health service delay in pulmonary tuberculosis patients attending a referral hospital: a cross-sectional study. *BMC Public Health* 5: 122.
- Karim F, Islam MA, Chowdhury AM, Johansson E, Diwan VK (2007) Gender differences in delays in diagnosis and treatment of tuberculosis. *Health Policy Plan* 22: 329–334.
- Rumman KA, Sabra NA, Bakri F, Scita A, Bassili A (2008) Prevalence of tuberculosis suspects and their healthcare-seeking behavior in urban and rural Jordan. *Am J Trop Med Hyg* 79: 545–551.

## Author Contributions

Conceived and designed the experiments: GA AD. Analyzed the data: GA AD. Contributed reagents/materials/analysis tools: GA AD LA KW JS MT A Abdissa FD CJ MB A Aseffa LD RC. Wrote the paper: GA AD. Coordinated the field work: GA. Designed the study: LA KW JS MT A Abdissa FD CJ MB. Reviewed the article: LA KW JS MT A Abdissa FD CJ MB A Aseffa. Supervised data collection: KW JS MT A Abdissa FD CJ MB. Critically reviewed the article: LD RC.
